# Supplementary material for: Local hydrophobicity allows high-performance electrochemical carbon monoxide reduction to C2+ products
Source: PubMed Central journal article supplement — EES Catal. 2023 Mar 13;1(3):263–73. doi: 10.1039/d3ey00006k (PMC10193833; doi:10.1039/d3ey00006k), 2023-03-13
Supplement: EY-001-D3EY00006K-s001.pdf [file EY-001-D3EY00006K-s001.pdf]

– **Electronic Supplementary Information** –

**Local hydrophobicity allows high-performance electrochemical carbon  
monoxide reduction to C<sub>2</sub>+ products**

Attila Kormányos,<sup>a</sup> Balázs Endródi<sup>a,\*</sup>, Zheng Zhang<sup>a</sup>, Angelika Samu<sup>a</sup>, László Mérai<sup>a</sup>,  
Gergely F. Samu<sup>a,b</sup>, László Janovák<sup>a</sup>, and Csaba Janáky<sup>a,b,\*\*</sup>

<sup>a</sup>University of Szeged, Department of Physical Chemistry and Materials Science, Aradi sq. 1,  
Szeged, 6720, Hungary

<sup>b</sup>ELI-ALPS, ELI-HU Non-Profit Ltd., Wolfgang Sandner 3, Szeged H-6728, Hungary

\*Correspondence: [endrodib@chem.u-szeged.hu](mailto:endrodib@chem.u-szeged.hu)

\*\*Correspondence: [janaky@chem.u-szeged.hu](mailto:janaky@chem.u-szeged.hu)

## Morphology of the Capstone ST-110 containing catalyst layers

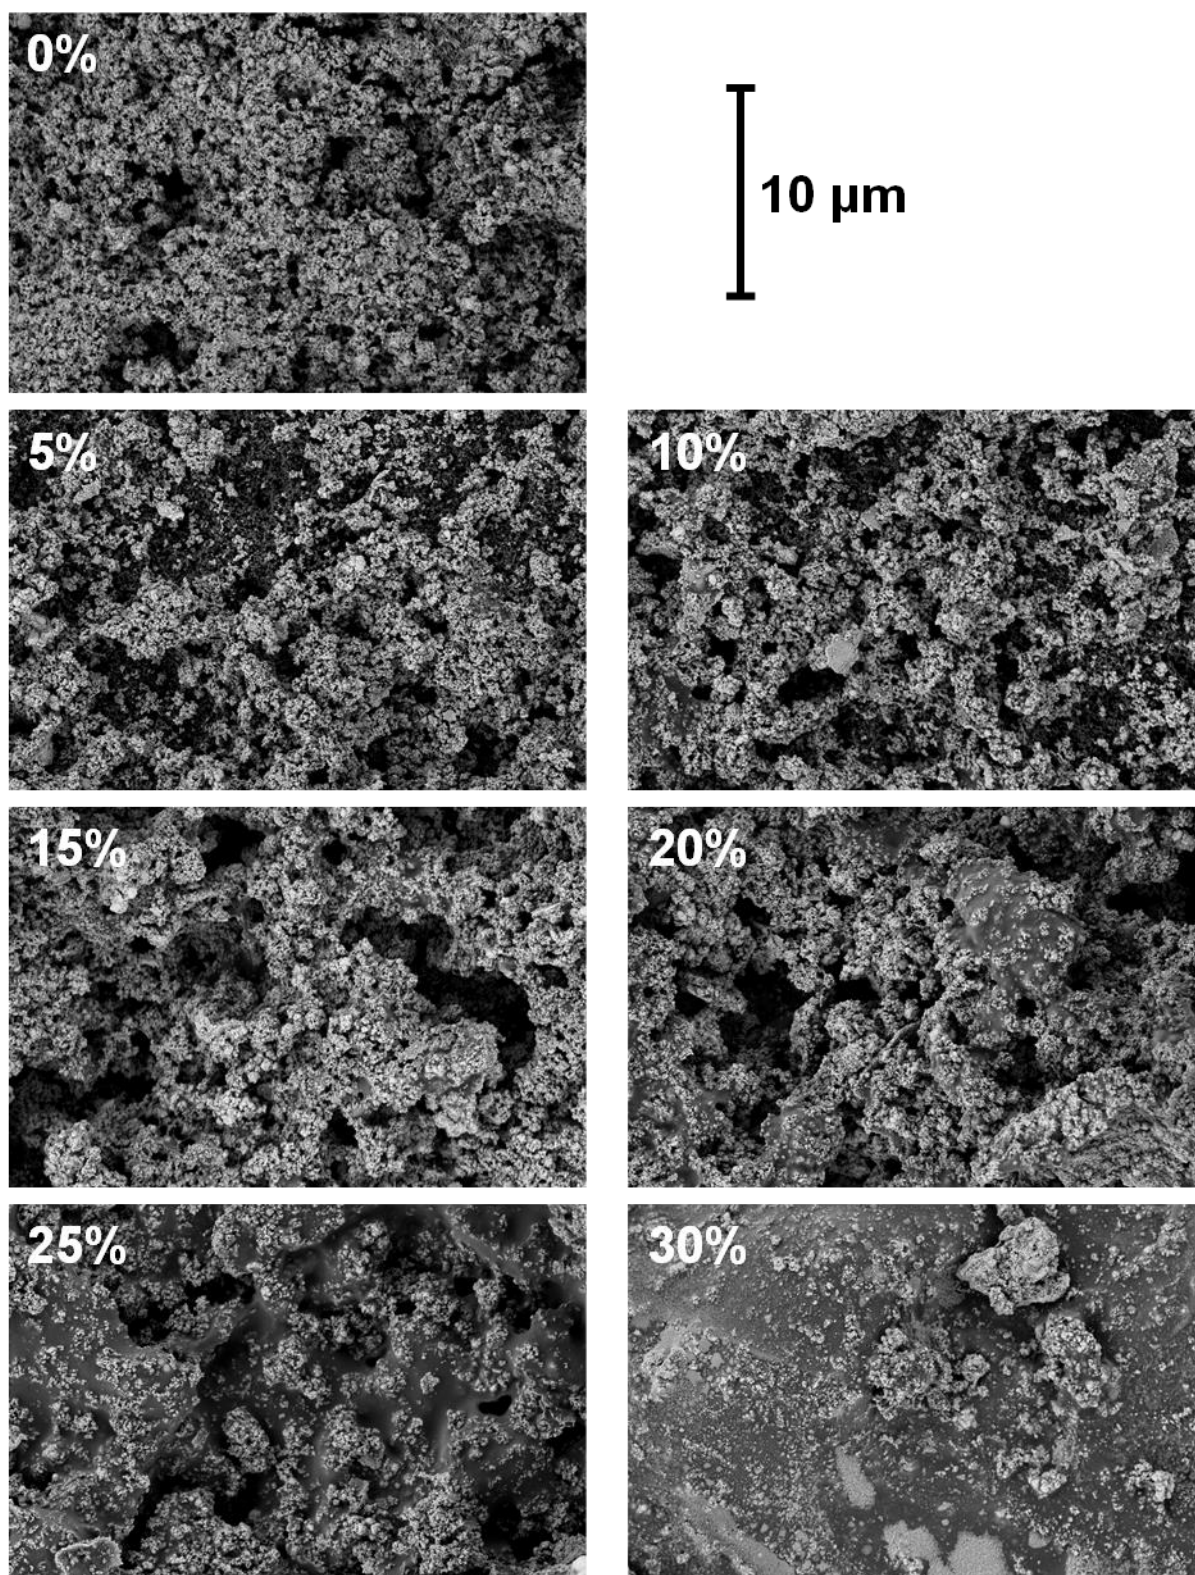

**Figure S1.** SEM images recorded for the Cu NP GDEs with different CST content (wt%, as indicated in the images).

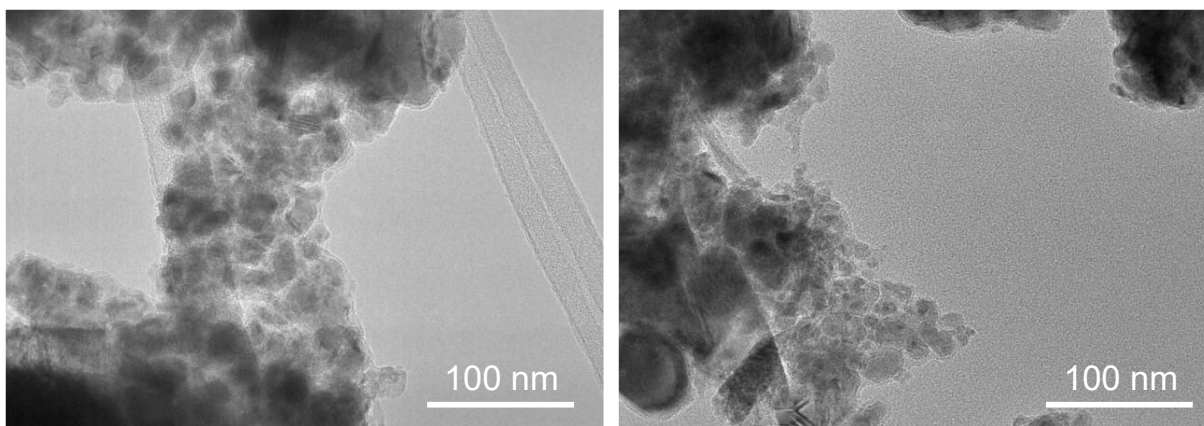

**Figure S2.** TEM images captured from the bare Cu NPs and that were used for the calculation of the particle size distribution.

## Structure and gas adsorption properties of the Capstone ST-110 binder

The structure of the Capstone ST-110 (CST) pore sealer polymer is a trade secret that is not shared with the end users. However, based on the safety data sheet of the material, it is a “terpolymer of fluorinated alkyl-methacrylates, dialkylammoniumalkyl methacrylate acetate salts, and aliphatic acids”. Based on former studies on the importance of nitrogen moieties in the catalysts layer in the case of electrochemical CO<sub>2</sub> reduction, we assume that any specific interaction of the polymer and the reactant gas (CO in our case) might be related to this part. In **Figure S3**, we, therefore, show the general structure of the N-containing block of the polymer. Interestingly, a pendant quaternary ammonium group is attached to the polymer backbone. We mention that this motif is very similar to what is seen in generally applied anion exchange membranes and ionomers.

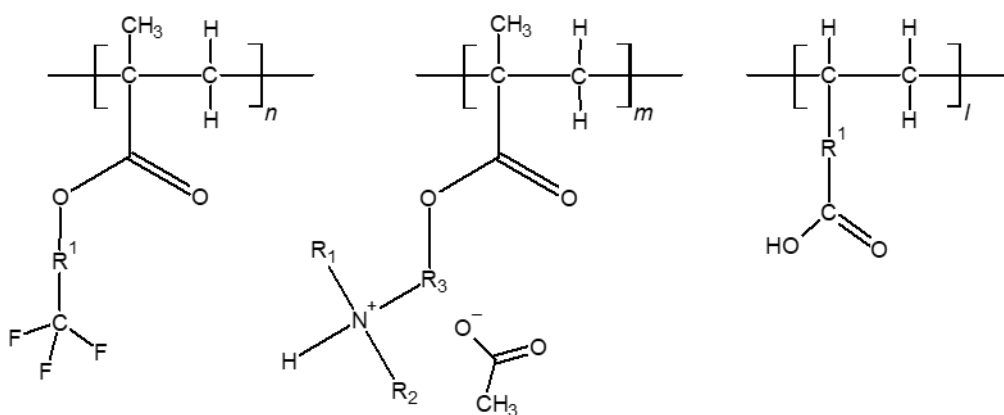

**Figure S3.** The assumed general structure of the 3 monomers of the Capstone ST-110 terpolymer, as derived from the safety data sheet of the material. Note that the exact formula is a trade secret and therefore it is not disclosed with the end-users.

The gas adsorption properties of the Capstone ST-110 polymer were evaluated in quartz crystal microbalance (QCM) measurements. A thin film of the polymer was formed on Au-coated quartz crystals by drop-casting (ca. 300 μg polymer). After drying, the polymer coated QCM crystal was placed in the resonator head, that was mounted in a sealed gas chamber. The gas chamber was purged with Ar, CO or CO<sub>2</sub> gas at a gas flow-rate of 50 cm<sup>3</sup> min<sup>-1</sup>. The mass change was calculated from the Sauerbrey equation ( $\Delta f = -C \times \Delta m$ ), using a constant value of  $C = 56.6 \text{ Hz } \mu\text{g}^{-1} \text{ cm}^2$ , as provided in the manual of the SRS QCM200 instrument. Based on the QCM measurements (**Figure S4**), no specific CO adsorption occurs on the Capstone ST-110 polymer. On the other hand, we could prove the adsorption of carbon dioxide,

suggesting that this binder might aid the reactant adsorption during the electrochemical reduction of CO<sub>2</sub> (CO<sub>2</sub>RR).

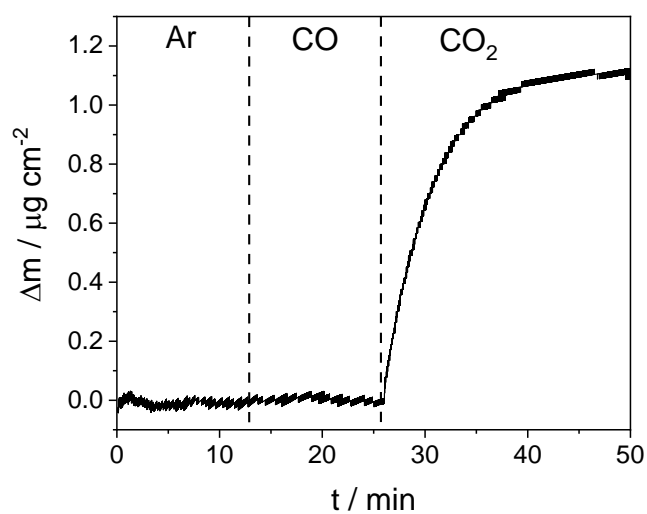

**Figure S4.** QCM measurements on Capstone ST-110 coated quartz crystals (Au coated), meanwhile purging the gas chamber around the sample with  $u = 50 \text{ cm}^3 \text{ min}^{-1}$  Ar, CO or CO<sub>2</sub> gas, as shown in the figure.

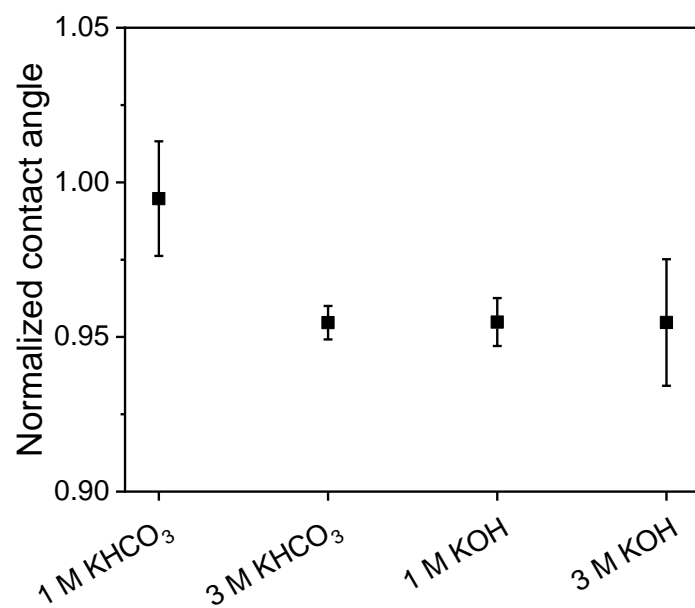

**Figure S5.** Normalized contact angles measured in various electrolytes at Cu NPs GDE with 5 wt% CST content. Contact angles were normalized by the average contact angle measured using pure water.

**Microfluidic electrolyzer cell used for the electrochemical CO reduction (CORR) measurements**

The CORR measurements were performed in a single electrolyte-separated microfluidic electrolyzer cell (**Figure S3**), with an active surface area of  $A = 1 \text{ cm}^2$ .

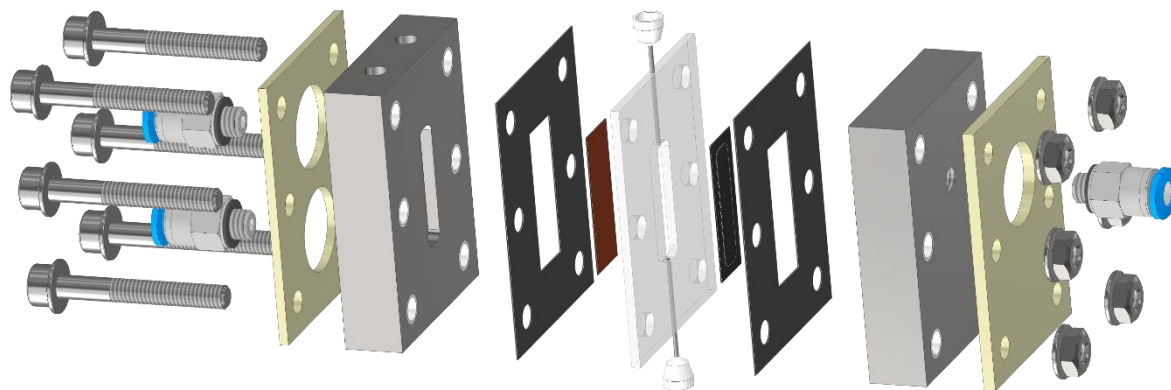

**Figure S6.** Schematic exploded view of the used microfluidic electrolyzer cell. The window size on the flow channel is  $0.5 \text{ cm} \times 2 \text{ cm}$ .

## Electrochemical CO reduction measurements using Capstone ST-110 (CST) binder

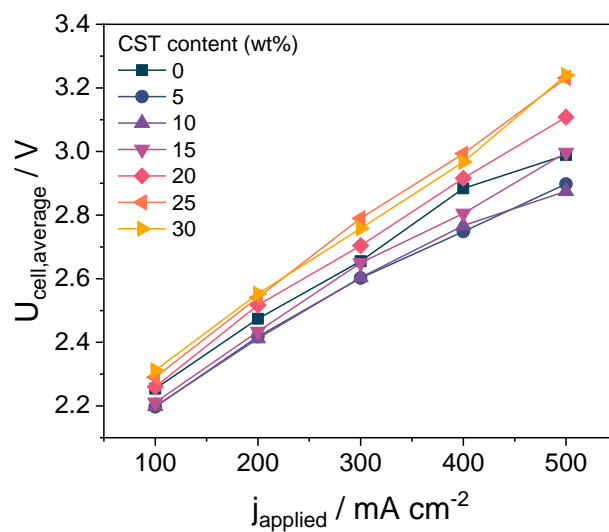

**Figure S7.** Averaged cell voltages measured during chronovoltammetric CORR measurements using samples with varying CST content at applied current densities between 100-500  $\text{mA cm}^{-2}$ . The measurements were performed at room temperature, applying a single 1 M KOH electrolyte solution. The CO gas flow rate was 26.5 sccm, while the electrolyte solution was fed at a rate of  $0.5 \text{ cm}^3 \text{ min}^{-1}$ . The lines among the data points serve only as a guide to the eyes.



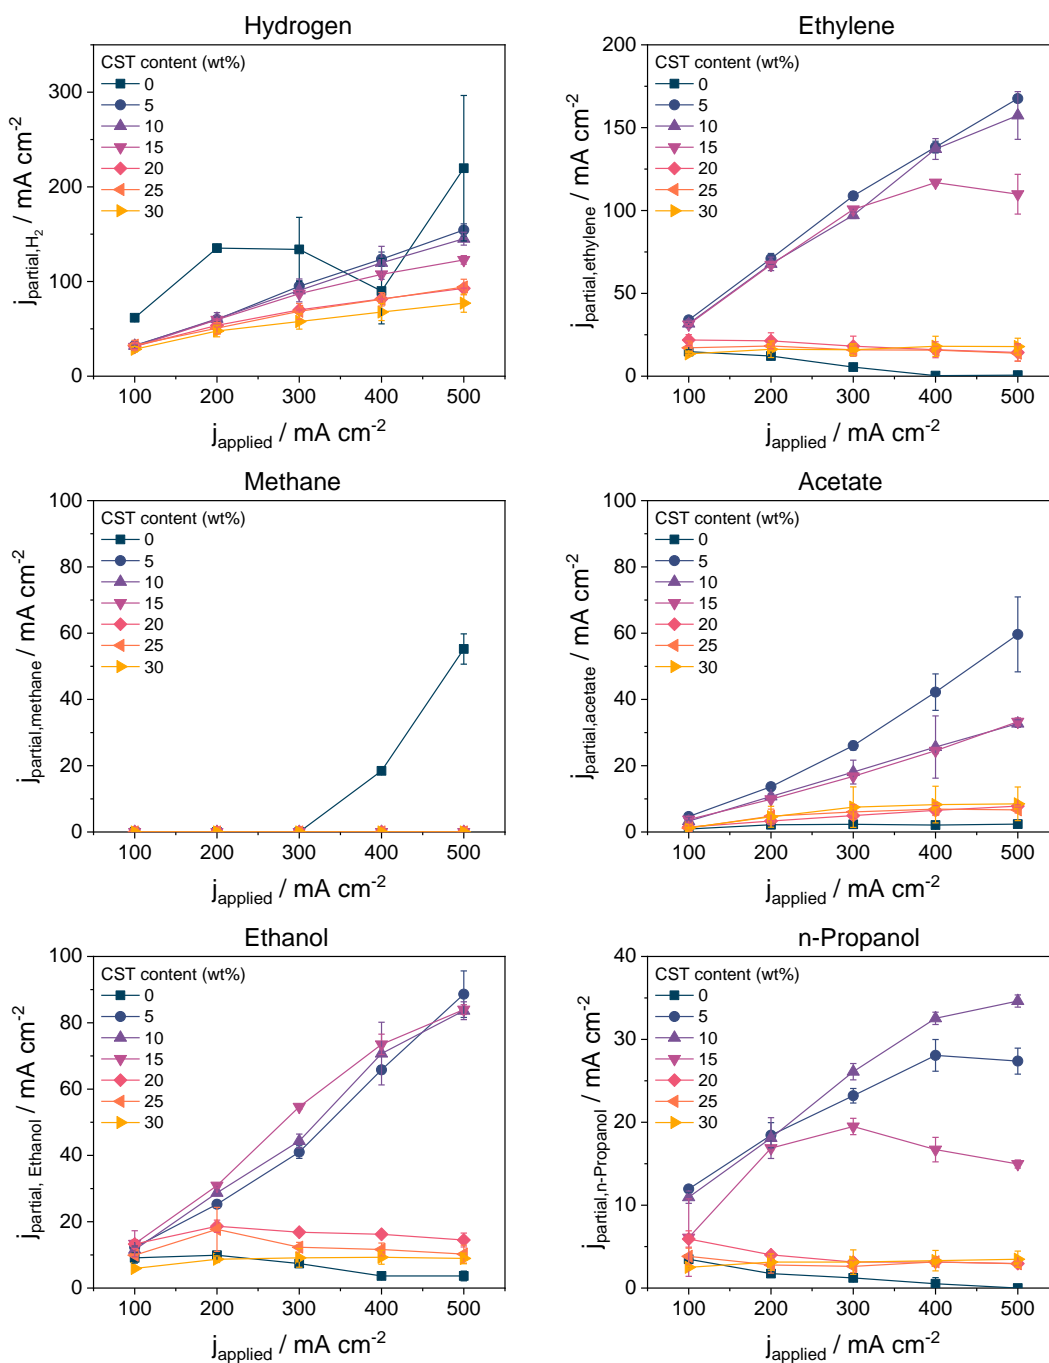

**Figure S8.** Product formation rates during CORR at different current densities, using catalyst layers containing  $1 \text{ mg cm}^{-2}$   $d < 25 \text{ nm}$  Cu nanoparticles and different amounts of CST binder. The measurements were performed at room temperature, applying a single 1 M KOH electrolyte solution. The CO gas flow rate was 26.5 sccm, while the electrolyte solution was fed at a rate of  $0.5 \text{ cm}^3 \text{ min}^{-1}$ . The lines among the data points serve only as a guide to the eyes.

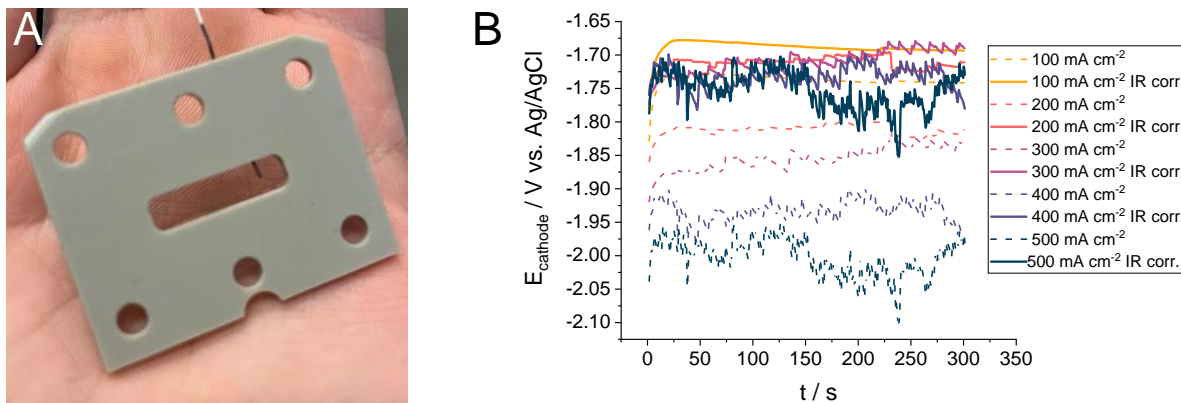

**Fig. S9.** (A) Photograph taken of the reference electrode in the microfluidic flow element. (B) Uncompensated and IR-corrected cathode potential recorded during chronopotentiometric experiments applying various current densities using a Cu NPs+5% CST sample and a 1 M KOH electrolyte solution. The electrolyte flow rate was  $1 \text{ cm}^3 \text{ min}^{-1}$ , while the CO flow rate was fixed at  $26.5 \text{ sccm}$ . Solution resistance was determined by conducting current interruption measurements at each applied current density prior to the chronopotentiometric experiments. 85% of this value was used for the IR correction.

| Current density / $\text{mA cm}^{-2}$ | $R_s / \Omega$ |
|---------------------------------------|----------------|
| 100                                   | 0.602          |
| 200                                   | 0.628          |
| 300                                   | 0.630          |
| 400                                   | 0.627          |
| 500                                   | 0.666          |

**Table S1.:**  $R_s$  values determined by performing a current interruption measurement prior to the chronopotentiometry experiment.

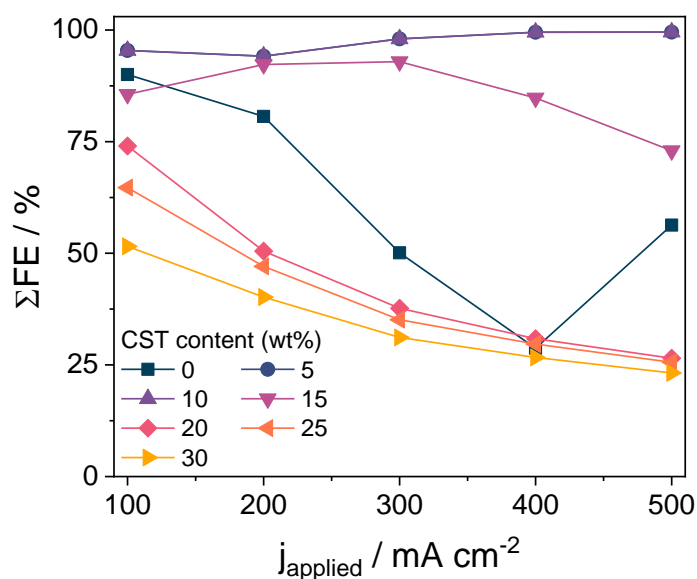

**Figure S10.** The total FE during the measurements presented in **Figure S5**. The total FE was calculated by summing up the partial current densities determined for the formation of different products, dividing it by the total current density, and multiplying it by 100% (to transform to the percentage scale). The lines among the data points serve only as a guide to the eyes.

At higher binder contents, the total FE remained notably below 100 %, in some cases, we could only account for 20-30% of the total charge. We assumed that the formation of gas products in the liquid stream (or their breakthrough) is behind this phenomenon. Therefore, we modified our experimental setup to collect the gas products from both the gas outlet port of the cell and from the electrolyte solution after liquid-gas separation (**Figure S8**). As detailed in the manuscript (**Figure 2D**), a large amount of hydrogen was detected that left the electrolyzer cell together with the liquid stream.

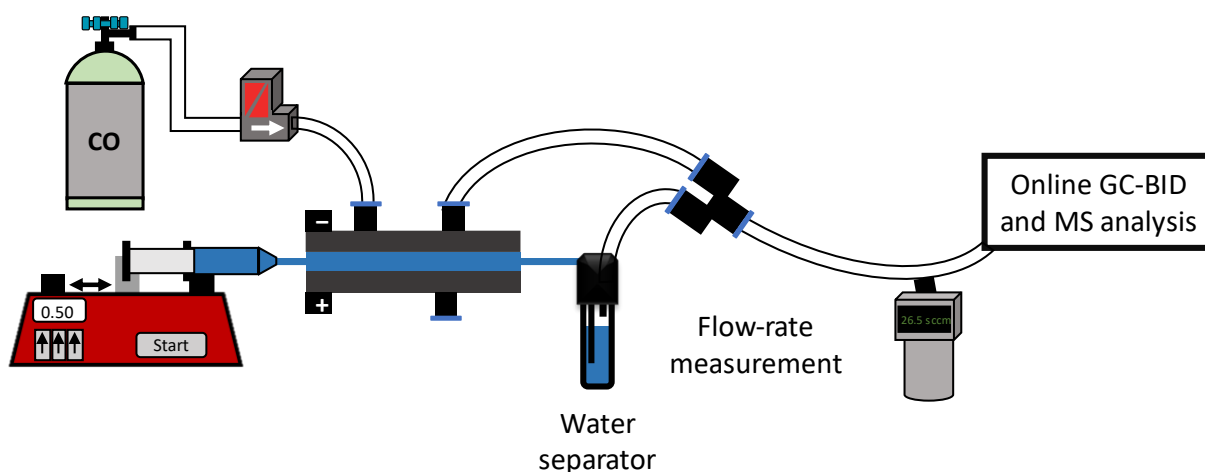

**Figure S11.** Schematic drawing of the experimental setup used for studying the gas products formed in the gas and liquid phases together.

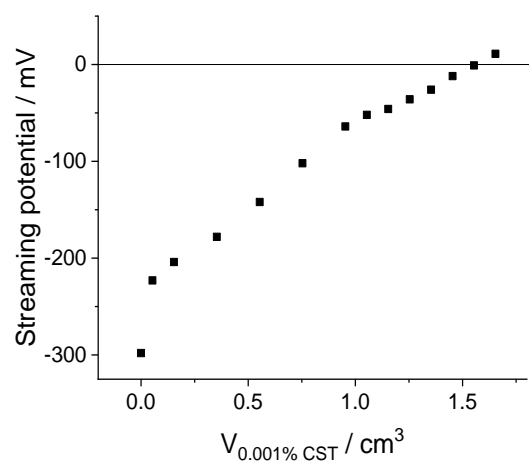

**Fig. S12.** Determination of the amount of the electrostatically adhered CST on the surface of CuNPs.

## Electrochemical CO reduction measurements using Nafion binder and PTFE particles containing catalyst layers

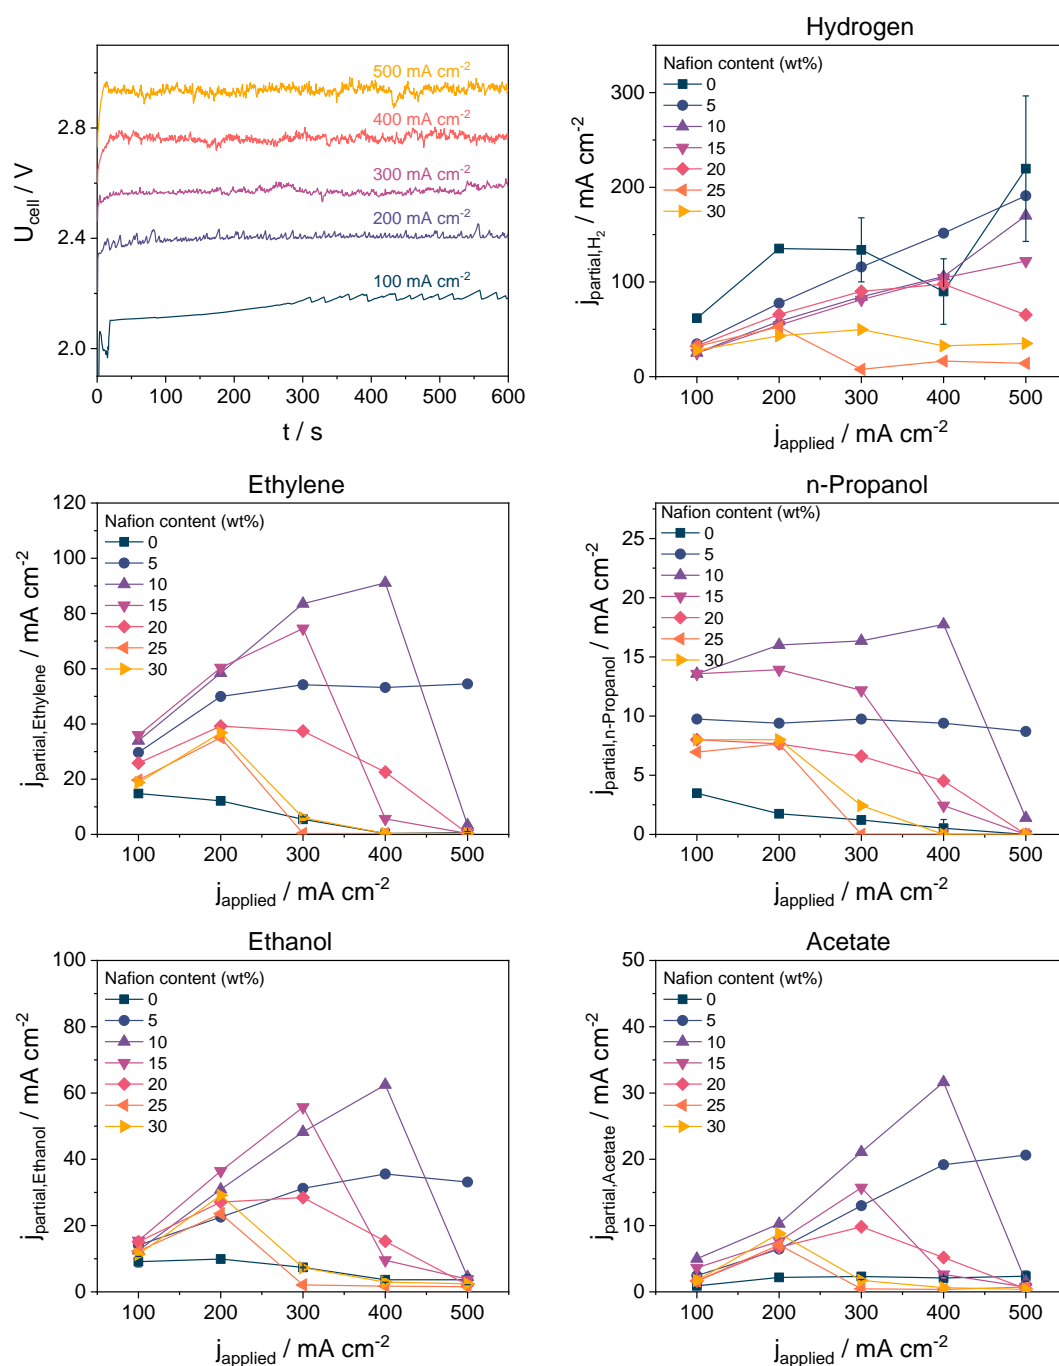

**Figure S13.** (A) Chronovoltammograms and product formation rates during CORR at different current densities, using catalyst layers containing  $1 \text{ mg cm}^{-2}$   $d < 25 \text{ nm}$  Cu nanoparticles and different amounts of Nafion binder. The measurements were performed at room temperature, applying a single 1 M KOH electrolyte solution. The CO gas flow rate was 26.5 sccm, while the electrolyte solution was fed at a rate of  $0.5 \text{ cm}^3 \text{ min}^{-1}$ . The lines among the data points serve only as a guide to the eyes.

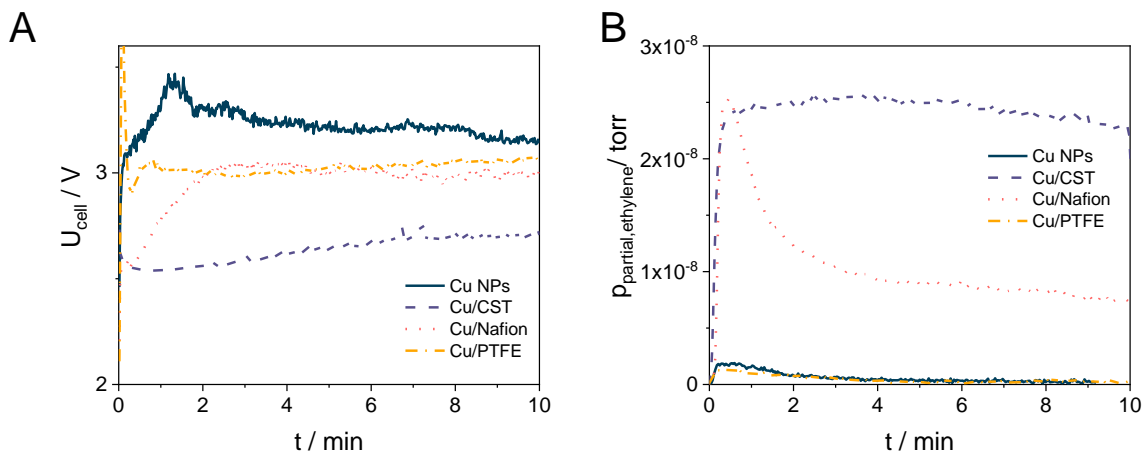

**Figure S14.** (A) Chronovoltammometry curves and (B) ethylene formation rate from mass spectrometry measurements during CORR at  $500 \text{ mA cm}^{-2}$  current density, using Cu NP GDEs with different binders. The amount of the binder was 5 wt% in all cases. The measurements were performed at room temperature, applying a single 1 M KOH electrolyte solution. The CO gas flow rate was 26.5 sccm, while the electrolyte solution was fed at a rate of  $0.5 \text{ cm}^3 \text{ min}^{-1}$ .

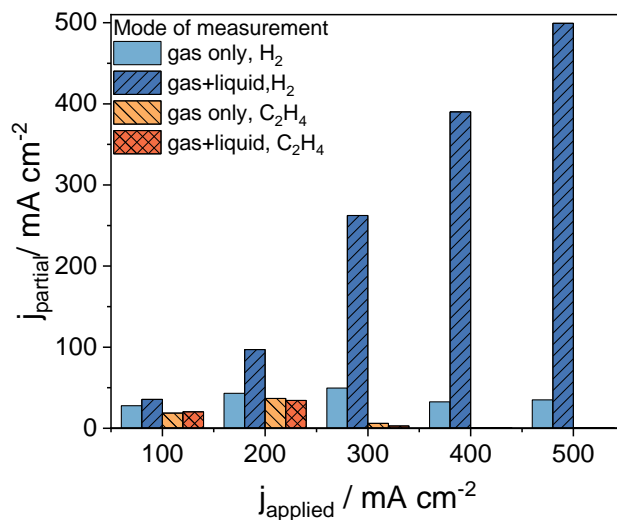

**Figure S15.** Product distribution obtained by performing electrolysis measurements at different current densities using 5 wt% Nafion and Cu NPs containing GDE cathodes. The amount of the formed gas products were either recorded only from the gas outlet stream (“gas only”) or by connecting the gas and liquid outlet stream after a water separator unit (“gas+liquid”).

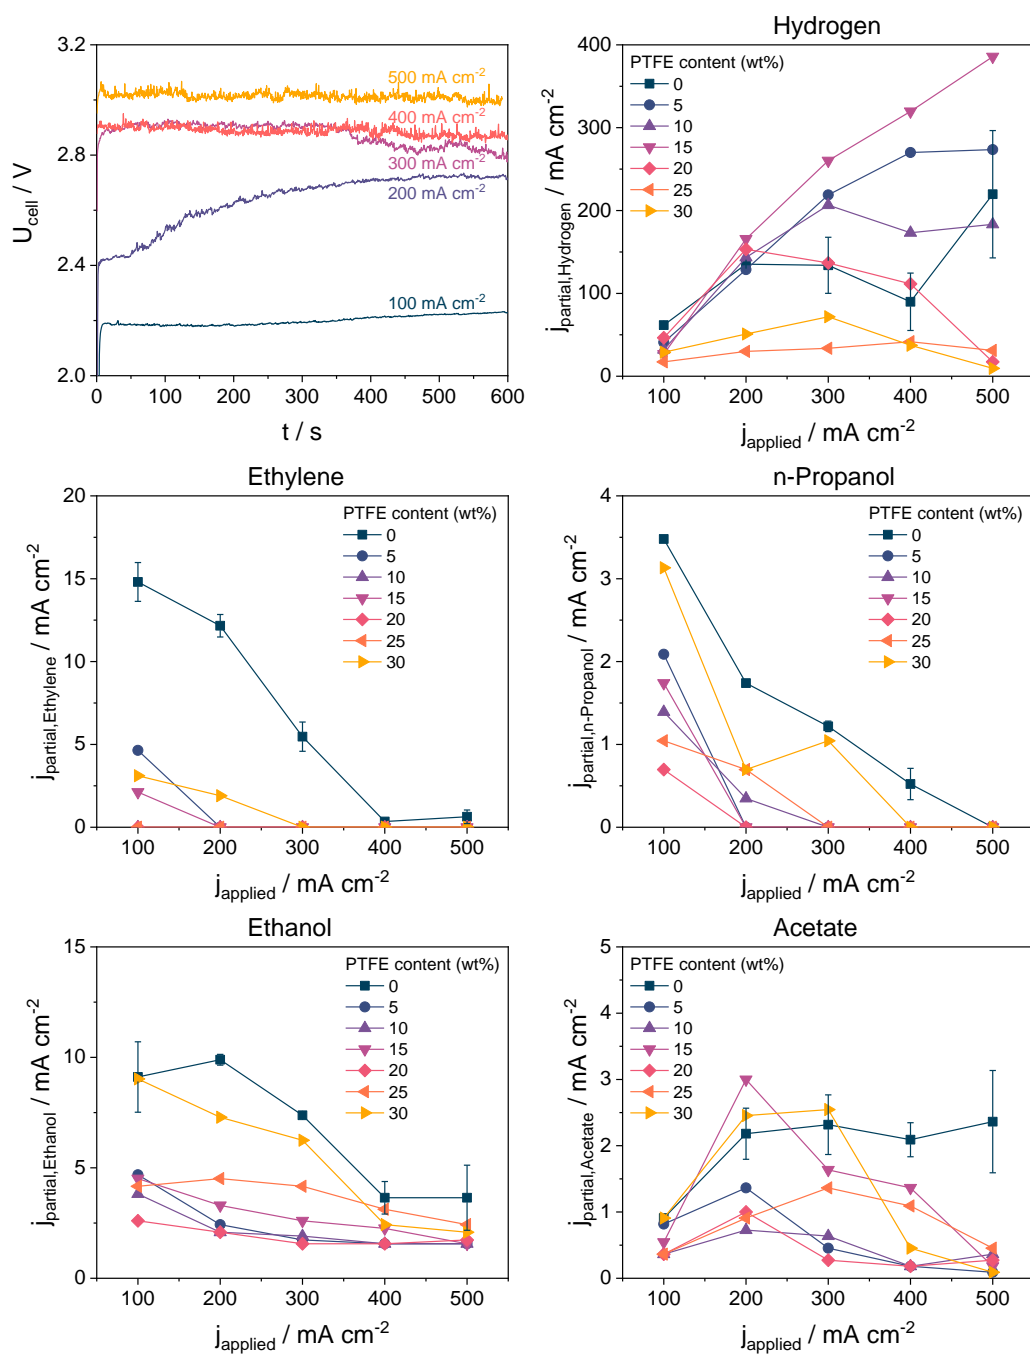

**Figure S16.** (A) Chronovoltammometry curves and product formation rates during CORR at different current densities, using catalyst layers containing  $1 \text{ mg cm}^{-2}$   $d < 25 \text{ nm}$  Cu nanoparticles and different amounts of PTFE particles as a binder. The measurements were performed at room temperature, applying a single  $1 \text{ M KOH}$  electrolyte solution. The  $\text{CO}$  gas flow rate was  $26.5 \text{ sccm}$ , while the electrolyte solution was fed at a rate of  $0.5 \text{ cm}^3 \text{ min}^{-1}$ . The lines among the data points serve only as a guide to the eyes.

**Topology of the CST containing Cu NP GDEs used in CORR experiments**

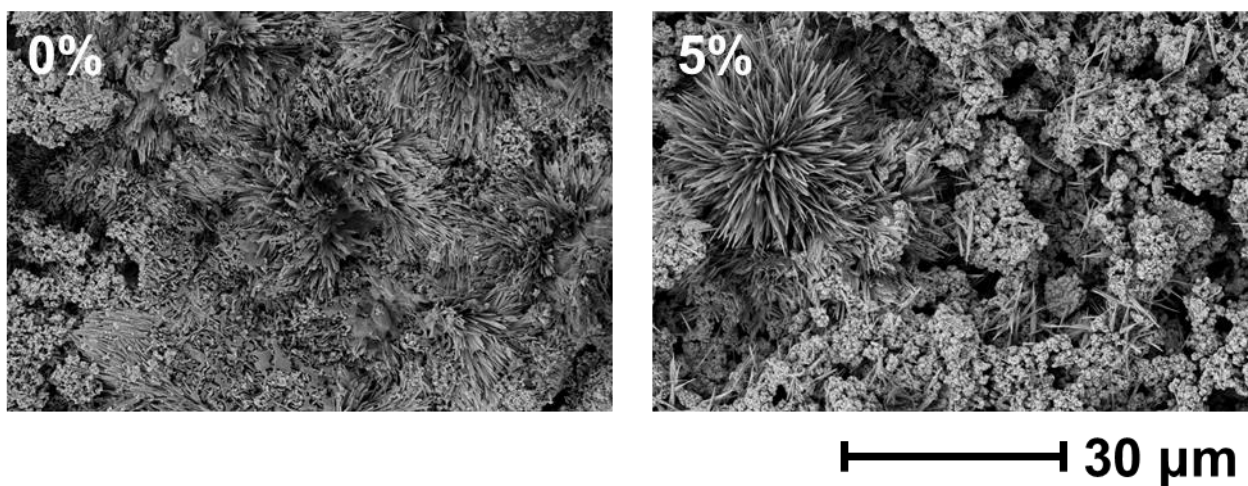

**Figure S17.** SEM images recorded for the Cu NP GDEs with different CST content (as indicated in the images) after performing CORR electrolysis experiments on them.



**Table S2.** Faradaic efficiencies during the measurements presented in the manuscript.

| <b>Figure 2C</b>                                      |                                                                           |                                                    |                      |                                   |                       |               |             |                |
|-------------------------------------------------------|---------------------------------------------------------------------------|----------------------------------------------------|----------------------|-----------------------------------|-----------------------|---------------|-------------|----------------|
| <b>Sample /<br/>electrolyte</b>                       | <b><math>j_{\text{total}} /</math><br/><math>\text{mA cm}^{-2}</math></b> | <b><math>\Sigma\text{FE} /</math><br/><b>%</b></b> | <b>FE%</b>           |                                   |                       |               |             |                |
|                                                       |                                                                           |                                                    | <b>H<sub>2</sub></b> | <b>C<sub>2</sub>H<sub>4</sub></b> | <b>CH<sub>4</sub></b> | <b>n-PrOH</b> | <b>EtOH</b> | <b>Acetate</b> |
| 5 wt% CST,<br>1 M KOH                                 | 100                                                                       | 95.41                                              | 32.5                 | 34.0                              | 0                     | 11.9          | 12.3        | 4.7            |
|                                                       | 200                                                                       | 94.13                                              | 30.0                 | 35.5                              | 0                     | 9.2           | 12.6        | 6.8            |
|                                                       | 300                                                                       | 98.02                                              | 31.7                 | 36.3                              | 0                     | 7.7           | 13.7        | 8.7            |
|                                                       | 400                                                                       | 99.50                                              | 30.9                 | 34.6                              | 0                     | 7.0           | 16.5        | 10.6           |
|                                                       | 500                                                                       | 99.52                                              | 30.9                 | 33.5                              | 0                     | 5.5           | 17.7        | 11.9           |
| <b>Figure 2D</b>                                      |                                                                           |                                                    |                      |                                   |                       |               |             |                |
| 0 wt% CST, 1 M<br>KOH, gas from<br>only gas stream    | 300                                                                       | 50.10                                              | 44.6                 | 1.8                               | 0                     | 0.4           | 2.5         | 0.8            |
| 0 wt% CST, 1 M<br>KOH, gas from<br>gas+liquid stream  | 300                                                                       | 89.64                                              | 83.3                 | 2.7                               | 0                     | 0.4           | 2.5         | 0.8            |
| 5 wt% CST, 1 M<br>KOH, gas from<br>only gas stream    | 300                                                                       | 86.69                                              | 20.3                 | 36.3                              | 0                     | 7.7           | 13.7        | 8.7            |
| 5 wt% CST, 1 M<br>KOH, gas from<br>gas+liquid stream  | 300                                                                       | 86.23                                              | 22.5                 | 33.7                              | 0                     | 7.7           | 13.7        | 8.6            |
| 10 wt% CST, 1 M<br>KOH, gas from<br>only gas stream   | 300                                                                       | 86.98                                              | 20.3                 | 36.0                              | 0                     | 8.7           | 15.9        | 6.0            |
| 10 wt% CST, 1 M<br>KOH, gas from<br>gas+liquid stream | 300                                                                       | 86.66                                              | 21.4                 | 37.9                              | 0                     | 6.9           | 14.8        | 4.7            |

| Sample /<br>electrolyte                               | $j_{\text{total}} /$<br>$\text{mA cm}^{-2}$ | $\Sigma\text{FE} /$<br>% | FE%          |                        |               |            |      |         |
|-------------------------------------------------------|---------------------------------------------|--------------------------|--------------|------------------------|---------------|------------|------|---------|
|                                                       |                                             |                          | $\text{H}_2$ | $\text{C}_2\text{H}_4$ | $\text{CH}_4$ | n-<br>PrOH | EtOH | Acetate |
| 15 wt% CST, 1 M<br>KOH, gas from<br>only gas stream   | 300                                         | 88.77                    | 24.9         | 33.6                   | 0             | 6.5        | 18.2 | 5.6     |
| 15 wt% CST, 1 M<br>KOH, gas from<br>gas+liquid stream | 300                                         | 87.76                    | 24.7         | 36.0                   | 0             | 5.6        | 16.7 | 4.7     |
| 20 wt% CST, 1 M<br>KOH, gas from<br>only gas stream   | 300                                         | 37.70                    | 23.4         | 6.0                    | 0             | 1.0        | 5.6  | 1.7     |
| 20 wt% CST, 1 M<br>KOH, gas from<br>gas+liquid stream | 300                                         | 88.81                    | 70.1         | 10.4                   | 0             | 1.0        | 5.6  | 1.7     |
| 25 wt% CST, 1 M<br>KOH, gas from<br>only gas stream   | 300                                         | 35.13                    | 22.8         | 5.3                    | 0             | 0.9        | 4.1  | 2.0     |
| 25 wt% CST, 1 M<br>KOH, gas from<br>gas+liquid stream | 300                                         | 95.44                    | 81.5         | 7.0                    | 0             | 0.9        | 4.1  | 2.0     |
| 30 wt% CST, 1 M<br>KOH, gas from<br>only gas stream   | 300                                         | 31.16                    | 19.3         | 5.3                    | 0             | 1.0        | 3.0  | 2.5     |
| 30 wt% CST, 1 M<br>KOH, gas from<br>gas+liquid stream | 300                                         | 90.50                    | 75.5         | 8.4                    | 0             | 1.0        | 3.0  | 2.5     |

**Figure 3.**

| Sample /<br>electrolyte       | $j_{\text{total}} /$<br>$\text{mA cm}^{-2}$ | $\Sigma\text{FE} /$<br>% | FE%            |                               |                 |            |      |         |
|-------------------------------|---------------------------------------------|--------------------------|----------------|-------------------------------|-----------------|------------|------|---------|
|                               |                                             |                          | H <sub>2</sub> | C <sub>2</sub> H <sub>4</sub> | CH <sub>4</sub> | n-<br>PrOH | EtOH | Acetate |
| 0 wt% CST GDE,<br>1 M KOH     | 500                                         | 45.26                    | 43.9           | 0.1                           | 0               | 0.0        | 0.7  | 0.5     |
| 5 wt% CST GDE,<br>1 M KOH     | 500                                         | 99.52                    | 30.9           | 33.5                          | 0               | 5.5        | 17.7 | 11.9    |
| 10 wt% CST<br>GDE, 1 M KOH    | 500                                         | 90.72                    | 29.0           | 31.5                          | 0               | 6.9        | 16.7 | 6.5     |
| 15 wt% CST<br>GDE, 1 M KOH    | 500                                         | 72.98                    | 24.6           | 22.0                          | 0               | 3.0        | 16.8 | 6.7     |
| 20 wt% CST<br>GDE, 1 M KOH    | 500                                         | 26.48                    | 18.6           | 2.9                           | 0               | 0.6        | 2.9  | 1.6     |
| 25 wt% CST<br>GDE, 1 M KOH    | 500                                         | 25.58                    | 18.8           | 2.8                           | 0               | 0.6        | 2.0  | 1.3     |
| 30 wt% CST<br>GDE, 1 M KOH    | 500                                         | 23.19                    | 15.4           | 3.6                           | 0               | 0.7        | 1.8  | 1.7     |
| 5 wt% Nafion<br>GDE, 1 M KOH  | 500                                         | 61.60                    | 38.2           | 10.9                          | 0               | 1.7        | 6.6  | 4.1     |
| 10 wt% Nafion<br>GDE, 1 M KOH | 500                                         | 36.18                    | 34.0           | 0.7                           | 0               | 0.3        | 0.9  | 0.3     |
| 15 wt% Nafion<br>GDE, 1 M KOH | 500                                         | 25.32                    | 24.4           | 0.0                           | 0               | 0.0        | 0.8  | 0.1     |
| 20 wt% Nafion<br>GDE, 1 M KOH | 500                                         | 13.56                    | 13.0           | 0.0                           | 0               | 0.0        | 0.4  | 0.1     |
| 25 wt% Nafion<br>GDE, 1 M KOH | 500                                         | 3.27                     | 2.8            | 0.0                           | 0               | 0.0        | 0.3  | 0.1     |

| Sample /<br>electrolyte       | $j_{\text{total}} /$<br>$\text{mA cm}^{-2}$ | $\Sigma\text{FE} /$<br>% | FE%          |                        |               |            |      |         |
|-------------------------------|---------------------------------------------|--------------------------|--------------|------------------------|---------------|------------|------|---------|
|                               |                                             |                          | $\text{H}_2$ | $\text{C}_2\text{H}_4$ | $\text{CH}_4$ | n-<br>PrOH | EtOH | Acetate |
| 30 wt% Nafion<br>GDE, 1 M KOH | 500                                         | 7.57                     | 7.0          | 0.0                    | 0             | 0.0        | 0.5  | 0.1     |
| 5 wt% PTFE<br>GDE, 1 M KOH    | 500                                         | 55.034                   | 54.7         | 0.0                    | 0             | 0.0        | 0.3  | 0.0     |
| 10 wt% PTFE<br>GDE, 1 M KOH   | 500                                         | 37.05                    | 36.7         | 0.0                    | 0             | 0.0        | 0.3  | 0.1     |
| 15 wt% PTFE<br>GDE, 1 M KOH   | 500                                         | 77.49                    | 77.1         | 0.0                    | 0             | 0.0        | 0.3  | 0.0     |
| 20 wt% PTFE<br>GDE, 1 M KOH   | 500                                         | 3.862                    | 3.5          | 0.0                    | 0             | 0.0        | 0.3  | 0.1     |
| 25 wt% PTFE<br>GDE, 1 M KOH   | 500                                         | 6.80                     | 6.2          | 0.0                    | 0             | 0.0        | 0.5  | 0.1     |
| 30 wt% PTFE<br>GDE, 1 M KOH   | 500                                         | 2.34                     | 1.9          | 0.0                    | 0             | 0.0        | 0.4  | 0.0     |
| <b>Figure 4B</b>              |                                             |                          |              |                        |               |            |      |         |
| 5 wt% CST GDE,<br>1 M LiOH    | 500                                         | 91.58                    | 19.8         | 41.2                   | 4.4           | 3.0        | 19.3 | 3.8     |
| 5 wt% CST GDE,<br>1 M NaOH    | 500                                         | 91.82                    | 21.0         | 44.0                   | 0.0           | 4.7        | 17.4 | 4.7     |
| 5 wt% CST GDE,<br>1 M KOH     | 500                                         | 93.37                    | 22.8         | 37.6                   | 0.0           | 7.8        | 20.3 | 4.9     |
| 5 wt% CST GDE,<br>1 M CsOH    | 500                                         | 91.06                    | 19.0         | 37.0                   | 0.0           | 12.6       | 16.4 | 6.1     |

| Figure 4C                 |                                             |                          |                |                               |                 |            |      |         |
|---------------------------|---------------------------------------------|--------------------------|----------------|-------------------------------|-----------------|------------|------|---------|
| Sample /<br>electrolyte   | $j_{\text{total}} /$<br>$\text{mA cm}^{-2}$ | $\Sigma\text{FE} /$<br>% | FE%            |                               |                 |            |      |         |
|                           |                                             |                          | H <sub>2</sub> | C <sub>2</sub> H <sub>4</sub> | CH <sub>4</sub> | n-<br>PrOH | EtOH | Acetate |
| 5 wt% CST GDE,<br>5 M KOH | 200                                         | 82.05                    | 10.9           | 29.5                          | 0.0             | 9.2        | 13.9 | 18.5    |
|                           | 200                                         | 86.75                    | 13.7           | 32.8                          | 0.0             | 10.2       | 11.7 | 18.3    |
|                           | 200                                         | 86.19                    | 16.2           | 32.6                          | 0.0             | 9.9        | 9.4  | 18.1    |
|                           | 200                                         | 92.51                    | 19.1           | 33.6                          | 0.0             | 11.6       | 10.0 | 18.2    |
|                           | 200                                         | 94.57                    | 21.5           | 32.4                          | 0.0             | 12.0       | 10.3 | 18.4    |
|                           | 200                                         | 92.79                    | 24.1           | 31.7                          | 0.0             | 9.2        | 8.3  | 19.5    |
|                           | 200                                         | 94.51                    | 26.0           | 32.1                          | 0.0             | 10.9       | 6.9  | 18.5    |
|                           | 200                                         | 93.93                    | 26.5           | 32.1                          | 0.0             | 11.3       | 5.3  | 18.8    |
|                           | 200                                         | 98.08                    | 31.0           | 32.0                          | 0.0             | 10.9       | 5.3  | 18.9    |
|                           | 200                                         | 96.42                    | 33.4           | 32.4                          | 0.0             | 9.5        | 4.2  | 17.0    |

**Table S2.** Faradaic efficiencies during the measurements presented in the Supporting Information.

| Figure S5-6                |                                             |                          |                |                               |                 |            |      |         |
|----------------------------|---------------------------------------------|--------------------------|----------------|-------------------------------|-----------------|------------|------|---------|
| Sample /<br>electrolyte    | $j_{\text{total}} /$<br>$\text{mA cm}^{-2}$ | $\Sigma\text{FE} /$<br>% | FE%            |                               |                 |            |      |         |
|                            |                                             |                          | H <sub>2</sub> | C <sub>2</sub> H <sub>4</sub> | CH <sub>4</sub> | n-<br>PrOH | EtOH | Acetate |
| 0 wt% CST GDE,<br>1 M KOH  | 100                                         | 90.0                     | 61.7           | 14.8                          | 0.0             | 3.5        | 9.1  | 0.9     |
|                            | 200                                         | 80.6                     | 67.7           | 6.1                           | 0.0             | 0.9        | 4.9  | 1.1     |
|                            | 300                                         | 50.1                     | 44.6           | 1.8                           | 0.0             | 0.4        | 2.5  | 0.8     |
|                            | 400                                         | 28.7                     | 22.5           | 0.1                           | 4.6             | 0.1        | 0.9  | 0.5     |
|                            | 500                                         | 56.3                     | 43.9           | 0.1                           | 11.0            | 0.0        | 0.7  | 0.5     |
| 5 wt% CST GDE,<br>1 M KOH  | 100                                         | 95.4                     | 32.5           | 34.0                          | 0.0             | 11.9       | 12.3 | 4.7     |
|                            | 200                                         | 94.1                     | 30.0           | 35.5                          | 0.0             | 9.2        | 12.6 | 6.8     |
|                            | 300                                         | 98.0                     | 31.7           | 36.3                          | 0.0             | 7.7        | 13.7 | 8.7     |
|                            | 400                                         | 99.5                     | 30.9           | 34.6                          | 0.0             | 7.0        | 16.5 | 10.6    |
|                            | 500                                         | 99.5                     | 30.9           | 33.5                          | 0.0             | 5.5        | 17.7 | 11.9    |
| 10 wt% CST<br>GDE, 1 M KOH | 100                                         | 89.6                     | 32.1           | 31.7                          | 0.0             | 11.0       | 11.5 | 3.3     |
|                            | 200                                         | 93.0                     | 30.3           | 33.9                          | 0.0             | 9.0        | 14.4 | 5.4     |
|                            | 300                                         | 92.1                     | 30.2           | 32.4                          | 0.0             | 8.7        | 14.8 | 6.0     |
|                            | 400                                         | 96.4                     | 29.9           | 34.3                          | 0.0             | 8.1        | 17.7 | 6.4     |
|                            | 500                                         | 90.7                     | 29.0           | 31.5                          | 0.0             | 6.9        | 16.7 | 6.5     |
| 15 wt% CST<br>GDE, 1 M KOH | 100                                         | 85.6                     | 31.1           | 31.2                          | 0.0             | 6.1        | 13.4 | 3.8     |
|                            | 200                                         | 92.3                     | 29.8           | 33.7                          | 0.0             | 8.4        | 15.4 | 4.9     |
|                            | 300                                         | 92.9                     | 29.0           | 33.6                          | 0.0             | 6.5        | 18.2 | 5.6     |
|                            | 400                                         | 84.8                     | 26.9           | 29.2                          | 0.0             | 4.2        | 18.4 | 6.1     |
|                            | 500                                         | 73.0                     | 24.6           | 22.0                          | 0.0             | 3.0        | 16.8 | 6.7     |

| Sample /<br>electrolyte    | $j_{\text{total}} /$<br>$\text{mA cm}^{-2}$ | $\Sigma\text{FE} /$<br>% | FE%          |                        |               |            |      |         |
|----------------------------|---------------------------------------------|--------------------------|--------------|------------------------|---------------|------------|------|---------|
|                            |                                             |                          | $\text{H}_2$ | $\text{C}_2\text{H}_4$ | $\text{CH}_4$ | n-<br>PrOH | EtOH | Acetate |
| 20 wt% CST<br>GDE, 1 M KOH | 100                                         | 74.0                     | 31.5         | 21.8                   | 0.0           | 5.9        | 13.3 | 1.5     |
|                            | 200                                         | 50.5                     | 26.8         | 10.7                   | 0.0           | 2.0        | 9.3  | 1.7     |
|                            | 300                                         | 37.7                     | 23.4         | 6.0                    | 0.0           | 1.0        | 5.6  | 1.7     |
|                            | 400                                         | 30.9                     | 20.4         | 4.0                    | 0.0           | 0.8        | 4.1  | 1.6     |
|                            | 500                                         | 26.5                     | 18.6         | 2.9                    | 0.0           | 0.6        | 2.9  | 1.6     |
| 25 wt% CST<br>GDE, 1 M KOH | 100                                         | 64.7                     | 32.6         | 17.2                   | 0.0           | 3.8        | 9.9  | 1.2     |
|                            | 200                                         | 47.1                     | 25.3         | 9.1                    | 0.0           | 1.4        | 8.9  | 2.4     |
|                            | 300                                         | 35.1                     | 22.8         | 5.3                    | 0.0           | 0.9        | 4.1  | 2.0     |
|                            | 400                                         | 29.7                     | 20.3         | 3.9                    | 0.0           | 0.8        | 2.9  | 1.7     |
|                            | 500                                         | 25.6                     | 18.8         | 2.8                    | 0.0           | 0.6        | 2.0  | 1.3     |
| 30 wt% CST<br>GDE, 1 M KOH | 100                                         | 51.6                     | 28.4         | 13.5                   | 0.0           | 2.5        | 5.9  | 1.3     |
|                            | 200                                         | 40.2                     | 23.9         | 8.1                    | 0.0           | 1.6        | 4.3  | 2.3     |
|                            | 300                                         | 31.2                     | 19.3         | 5.3                    | 0.0           | 1.0        | 3.0  | 2.5     |
|                            | 400                                         | 26.7                     | 16.9         | 4.5                    | 0.0           | 0.8        | 2.3  | 2.1     |
|                            | 500                                         | 23.2                     | 15.4         | 3.6                    | 0.0           | 0.7        | 1.8  | 1.7     |

| Figure S9                     |                                             |                          |                |                               |                 |            |      |         |
|-------------------------------|---------------------------------------------|--------------------------|----------------|-------------------------------|-----------------|------------|------|---------|
| Sample /<br>electrolyte       | $j_{\text{total}} /$<br>$\text{mA cm}^{-2}$ | $\Sigma\text{FE} /$<br>% | FE%            |                               |                 |            |      |         |
|                               |                                             |                          | H <sub>2</sub> | C <sub>2</sub> H <sub>4</sub> | CH <sub>4</sub> | n-<br>PrOH | EtOH | Acetate |
| 5 wt% Nafion<br>GDE, 1 M KOH  | 100                                         | 90.5                     | 34.6           | 29.7                          | 0.0             | 9.7        | 14.1 | 2.5     |
|                               | 200                                         | 83.0                     | 38.8           | 25.0                          | 0.0             | 4.7        | 11.3 | 3.2     |
|                               | 300                                         | 74.7                     | 38.6           | 18.1                          | 0.0             | 3.2        | 10.4 | 4.3     |
|                               | 400                                         | 67.2                     | 37.9           | 13.3                          | 0.0             | 2.3        | 8.9  | 4.8     |
|                               | 500                                         | 61.6                     | 38.2           | 10.9                          | 0.0             | 1.7        | 6.6  | 4.1     |
| 10 wt% Nafion<br>GDE, 1 M KOH | 100                                         | 90.3                     | 25.3           | 33.9                          | 0.0             | 13.6       | 12.5 | 5.0     |
|                               | 200                                         | 87.0                     | 29.2           | 29.2                          | 0.0             | 8.0        | 15.4 | 5.1     |
|                               | 300                                         | 84.5                     | 28.1           | 27.8                          | 0.0             | 5.5        | 16.1 | 7.0     |
|                               | 400                                         | 77.2                     | 26.4           | 22.8                          | 0.0             | 4.4        | 15.6 | 7.9     |
|                               | 500                                         | 36.2                     | 34.0           | 0.7                           | 0.0             | 0.3        | 0.9  | 0.3     |
| 15 wt% Nafion<br>GDE, 1 M KOH | 100                                         | 93.5                     | 24.9           | 36.0                          | 0.0             | 13.6       | 15.4 | 3.6     |
|                               | 200                                         | 86.4                     | 27.2           | 30.2                          | 0.0             | 7.0        | 18.2 | 3.8     |
|                               | 300                                         | 79.8                     | 27.1           | 24.9                          | 0.0             | 4.1        | 18.6 | 5.2     |
|                               | 400                                         | 31.1                     | 26.1           | 1.4                           | 0.0             | 0.6        | 2.4  | 0.7     |
|                               | 500                                         | 25.4                     | 24.4           | 0.1                           | 0.0             | 0.0        | 0.8  | 0.1     |
| 20 wt% Nafion<br>GDE, 1 M KOH | 100                                         | 83.0                     | 32.4           | 25.8                          | 0.0             | 8.0        | 15.1 | 1.6     |
|                               | 200                                         | 73.2                     | 32.8           | 19.6                          | 0.0             | 3.8        | 13.5 | 3.4     |
|                               | 300                                         | 57.5                     | 30.0           | 12.5                          | 0.0             | 2.2        | 9.5  | 3.3     |
|                               | 400                                         | 36.3                     | 24.4           | 5.6                           | 0.0             | 1.1        | 3.8  | 1.3     |
|                               | 500                                         | 13.6                     | 13.0           | 0.1                           | 0.0             | 0.0        | 0.4  | 0.1     |



| Sample /<br>electrolyte       | $j_{\text{total}} /$<br>$\text{mA cm}^{-2}$ | $\Sigma\text{FE} /$<br>% | FE%          |                        |               |            |      |         |
|-------------------------------|---------------------------------------------|--------------------------|--------------|------------------------|---------------|------------|------|---------|
|                               |                                             |                          | $\text{H}_2$ | $\text{C}_2\text{H}_4$ | $\text{CH}_4$ | n-<br>PrOH | EtOH | Acetate |
| 25 wt% Nafion<br>GDE, 1 M KOH | 100                                         | 72.6                     | 32.0         | 19.7                   | 0.0           | 7.0        | 12.3 | 1.6     |
|                               | 200                                         | 63.0                     | 26.3         | 17.5                   | 0.0           | 3.8        | 11.8 | 3.5     |
|                               | 300                                         | 3.5                      | 2.6          | 0.1                    | 0.0           | 0.0        | 0.7  | 0.2     |
|                               | 400                                         | 4.7                      | 4.1          | 0.1                    | 0.0           | 0.0        | 0.4  | 0.1     |
|                               | 500                                         | 3.3                      | 2.8          | 0.1                    | 0.0           | 0.0        | 0.3  | 0.1     |
| 30 wt% Nafion<br>GDE, 1 M KOH | 100                                         | 67.6                     | 27.8         | 18.8                   | 0.0           | 8.0        | 11.3 | 1.7     |
|                               | 200                                         | 63.0                     | 21.6         | 18.4                   | 0.0           | 4.0        | 14.6 | 4.4     |
|                               | 300                                         | 22.4                     | 16.6         | 2.0                    | 0.0           | 0.8        | 2.4  | 0.6     |
|                               | 400                                         | 9.1                      | 8.1          | 0.1                    | 0.0           | 0.0        | 0.7  | 0.2     |
|                               | 500                                         | 7.6                      | 7.0          | 0.1                    | 0.0           | 0.0        | 0.5  | 0.1     |

| <b>Figure S11</b>                                              |                                                              |                                              |                      |                                   |                       |                    |             |                |
|----------------------------------------------------------------|--------------------------------------------------------------|----------------------------------------------|----------------------|-----------------------------------|-----------------------|--------------------|-------------|----------------|
| <b>Sample /<br/>electrolyte</b>                                | <b><math>j_{total} /</math><br/><math>mA\ cm^{-2}</math></b> | <b><math>\Sigma FE /</math><br/><b>%</b></b> | <b>FE%</b>           |                                   |                       |                    |             |                |
|                                                                |                                                              |                                              | <b>H<sub>2</sub></b> | <b>C<sub>2</sub>H<sub>4</sub></b> | <b>CH<sub>4</sub></b> | <b>n-<br/>PrOH</b> | <b>EtOH</b> | <b>Acetate</b> |
| 5 wt% Nafion<br>GDE, 1 M KOH,<br>gas from only gas<br>stream   | 100                                                          | 46.56                                        | 27.8                 | 18.8                              | 0                     | n.a.               | n.a.        | n.a.           |
|                                                                | 200                                                          | 39.99                                        | 21.6                 | 18.4                              | 0                     | n.a.               | n.a.        | n.a.           |
|                                                                | 300                                                          | 18.56                                        | 16.6                 | 2.0                               | 0                     | n.a.               | n.a.        | n.a.           |
|                                                                | 400                                                          | 8.22                                         | 8.1                  | 0.1                               | 0                     | n.a.               | n.a.        | n.a.           |
|                                                                | 500                                                          | 7.08                                         | 7.0                  | 0.1                               | 0                     | n.a.               | n.a.        | n.a.           |
| 5 wt% Nafion<br>GDE, 1 M KOH,<br>gas from<br>gas+liquid stream | 100                                                          | 55.90                                        | 35.6                 | 20.3                              | 0                     | n.a.               | n.a.        | n.a.           |
|                                                                | 200                                                          | 65.66                                        | 48.5                 | 17.2                              | 0                     | n.a.               | n.a.        | n.a.           |
|                                                                | 300                                                          | 88.41                                        | 87.5                 | 0.9                               | 0                     | n.a.               | n.a.        | n.a.           |
|                                                                | 400                                                          | 97.69                                        | 97.5                 | 0.2                               | 0                     | n.a.               | n.a.        | n.a.           |
|                                                                | 500                                                          | 99.94                                        | 99.9                 | 0.1                               | 0                     | n.a.               | n.a.        | n.a.           |
| <b>Figure S12</b>                                              |                                                              |                                              |                      |                                   |                       |                    |             |                |
| 5 wt% PTFE<br>GDE, 1 M KOH                                     | 100                                                          | 53.087                                       | 40.9                 | 4.6                               | 0.0                   | 2.1                | 4.7         | 0.8            |
|                                                                | 200                                                          | 66.27                                        | 64.4                 | 0.0                               | 0.0                   | 0.0                | 1.2         | 0.7            |
|                                                                | 300                                                          | 73.69                                        | 73.0                 | 0.0                               | 0.0                   | 0.0                | 0.6         | 0.2            |
|                                                                | 400                                                          | 67.95                                        | 67.5                 | 0.0                               | 0.0                   | 0.0                | 0.4         | 0.0            |
|                                                                | 500                                                          | 55.035                                       | 54.7                 | 0.0                               | 0.0                   | 0.0                | 0.3         | 0.0            |
| 10 wt% PTFE<br>GDE, 1 M KOH                                    | 100                                                          | 37.63                                        | 32.1                 | 0.0                               | 0.0                   | 1.4                | 3.8         | 0.4            |
|                                                                | 200                                                          | 73.30                                        | 71.7                 | 0.0                               | 0.0                   | 0.2                | 1.0         | 0.4            |
|                                                                | 300                                                          | 69.71                                        | 68.9                 | 0.0                               | 0.0                   | 0.0                | 0.6         | 0.2            |
|                                                                | 400                                                          | 43.73                                        | 43.3                 | 0.0                               | 0.0                   | 0.0                | 0.4         | 0.0            |
|                                                                | 500                                                          | 37.05                                        | 36.7                 | 0.0                               | 0.0                   | 0.0                | 0.3         | 0.1            |

| Sample /<br>electrolyte     | $j_{\text{total}} /$<br>$\text{mA cm}^{-2}$ | $\Sigma\text{FE} /$<br>% | FE%          |                        |               |            |      |         |
|-----------------------------|---------------------------------------------|--------------------------|--------------|------------------------|---------------|------------|------|---------|
|                             |                                             |                          | $\text{H}_2$ | $\text{C}_2\text{H}_4$ | $\text{CH}_4$ | n-<br>PrOH | EtOH | Acetate |
| 15 wt% PTFE<br>GDE, 1 M KOH | 100                                         | 35.67                    | 26.7         | 2.1                    | 0.0           | 1.7        | 4.5  | 0.5     |
|                             | 200                                         | 86.01                    | 82.9         | 0.0                    | 0.0           | 0.0        | 1.6  | 1.5     |
|                             | 300                                         | 88.14                    | 86.7         | 0.0                    | 0.0           | 0.0        | 0.9  | 0.5     |
|                             | 400                                         | 80.82                    | 79.9         | 0.0                    | 0.0           | 0.0        | 0.6  | 0.3     |
|                             | 500                                         | 77.50                    | 77.1         | 0.0                    | 0.0           | 0.0        | 0.3  | 0.0     |
| 20 wt% PTFE<br>GDE, 1 M KOH | 100                                         | 50.05                    | 46.4         | 0.0                    | 0.0           | 0.7        | 2.6  | 0.4     |
|                             | 200                                         | 78.16                    | 76.6         | 0.0                    | 0.0           | 0.0        | 1.0  | 0.5     |
|                             | 300                                         | 46.20                    | 45.6         | 0.0                    | 0.0           | 0.0        | 0.5  | 0.1     |
|                             | 400                                         | 28.32                    | 27.9         | 0.0                    | 0.0           | 0.0        | 0.4  | 0.0     |
|                             | 500                                         | 3.86                     | 3.5          | 0.0                    | 0.0           | 0.0        | 0.3  | 0.1     |
| 25 wt% PTFE<br>GDE, 1 M KOH | 100                                         | 22.85                    | 17.3         | 0.0                    | 0.0           | 1.0        | 4.2  | 0.4     |
|                             | 200                                         | 18.05                    | 15.0         | 0.0                    | 0.0           | 0.3        | 2.3  | 0.5     |
|                             | 300                                         | 13.09                    | 11.3         | 0.0                    | 0.0           | 0.0        | 1.4  | 0.5     |
|                             | 400                                         | 11.46                    | 10.4         | 0.0                    | 0.0           | 0.0        | 0.8  | 0.3     |
|                             | 500                                         | 6.80                     | 6.2          | 0.0                    | 0.0           | 0.0        | 0.5  | 0.1     |
| 30 wt% PTFE<br>GDE, 1 M KOH | 100                                         | 45.15                    | 29.0         | 3.1                    | 0.0           | 3.1        | 9.0  | 0.9     |
|                             | 200                                         | 31.66                    | 25.5         | 1.0                    | 0.0           | 0.3        | 3.6  | 1.2     |
|                             | 300                                         | 27.21                    | 23.9         | 0.0                    | 0.0           | 0.3        | 2.1  | 0.8     |
|                             | 400                                         | 10.06                    | 9.3          | 0.0                    | 0.0           | 0.0        | 0.6  | 0.1     |
|                             | 500                                         | 2.34                     | 1.9          | 0.0                    | 0.0           | 0.0        | 0.4  | 0.0     |
